# Supplementary material for: Changes in sprint performance and sagittal plane kinematics after heavy resisted sprint training in professional soccer players
Source: PeerJ. 2020 Dec 15;8:e10507. doi: 10.7717/peerj.10507 (PMC7747683; doi:10.7717/peerj.10507)
Supplement: Supplemental Information 1 — Areas of analysis: player info, sprint split-times, sprint mechanical output, pre-post kinematics, and immediate effects of sled kinematics. [file peerj-08-10507-s001.xlsx]

## Sheet: player info
Group	Age	Height	Mass_pre	Mass_post
HS60_1	19	1.78	81.5	79.5
HS60_2	19	1.9	86	85.5
HS60_3	24	1.74	67.5	67.5
HS60_4	18	1.78	80	81.5
HS60_5	18	1.68	68	68.3
HS60_6	26	1.95	94.7	93
HS60_7	20	1.89	87.1	85.5
HS60_8	23	1.9	86	84.4
HS60_9	18	1.84	80.3	80
HS50_1	20	1.75	75	75
HS50_2	20	1.8	70	70.5
HS50_3	17	1.73	67	68
HS50_4	34	1.7	69	68.5
HS50_5	36	1.78	74.8	75.5
HS50_6	19	1.84	84	84
HS50_7	25	1.7	63.9	64.5
HS50_8	26	1.77	74.2	74.5
HS50_9	30	1.96	90.1	88.6
Control_1	29	1.84	80.8	80.8
Control_2	17	1.7	67.5	67.5
Control_3	31	1.69	70.5	71
Control_4	33	1.87	81	81.2
Control_5	28	1.79	70	73.3
Control_6	23	1.85	76.4	76.2
Control_7	17	1.7	67.5	67.9
Control_8	27	1.87	81.7	82
Control_9	28	1.77	70.5	70.8
Control_10	29	1.82	80.2	81.3

## Sheet: Split-times
Group	m5_pre	m5_post	m10_pre	m10_post	m20_pre	m20_post	m30_pre	m30_post
HS60_1	1.36639	1.34795	2.11305	2.09461	3.37172	3.35328	4.54505	4.52661
HS60_2	1.37736	1.32591	2.10269	2.02991	3.31869	3.24591	4.42803	4.35524
HS60_3	1.35153	1.32998	2.0982	2.05532	3.39953	3.33532	4.61553	4.55132
HS60_4	1.37194	1.35782	2.13994	2.10449	3.41994	3.40582	4.61461	4.63844
HS60_5	1.36012	1.33743	2.12812	2.06276	3.42945	3.34276	4.66678	4.55876
HS60_6	1.41771	1.34287	2.18571	2.0682	3.46571	3.32687	4.63905	4.52153
HS60_7	1.43408	1.37065	2.22341	2.11732	3.56741	3.39732	4.84741	4.61332
HS60_8	1.49741	1.44968	2.32941	2.21768	3.71607	3.58302	5.01741	4.84168
HS60_9	1.31683	1.30827	2.06349	2.0336	3.34349	3.27094	4.54849	4.44427
HS50_1	1.41461	1.3588	2.16128	2.08414	3.44128	3.3428	4.63594	4.51614
HS50_2	1.34863	1.24086	2.07396	1.92352	3.31129	3.09686	4.48463	4.22752
HS50_3	1.39852	1.34768	2.12386	2.07302	3.38252	3.33168	4.53452	4.46235
HS50_4	1.41008	1.34213	2.15674	2.06746	3.45808	3.34746	4.65274	4.54213
HS50_5	1.39029	1.38493	2.17962	2.13159	3.52362	3.45426	4.75724	4.69159
HS50_6	1.29852	1.34811	2.02386	2.07345	3.28252	3.31078	4.47719	4.46278
HS50_7	1.45531	1.3372	2.22331	2.06253	3.54598	3.29987	4.74065	4.45187
HS50_8	1.3685	1.36532	2.1365	2.09065	3.43784	3.34932	4.65384	4.50132
HS50_9	1.40123	1.35977	2.16923	2.08511	3.47056	3.36511	4.68656	4.55977
Control_1	1.41527	1.41551	2.18327	2.18351	3.50593	3.48485	4.7646	4.70085
Control_2	1.32577	1.36188	2.0511	2.08722	3.30977	3.32455	4.50444	4.45522
Control_3	1.38502	1.35932	2.13169	2.08466	3.43302	3.34332	4.67036	4.51666
Control_4	1.32014	1.32015	2.04547	2.06682	3.28281	3.34682	4.43481	4.56282
Control_5	1.33055	1.32069	2.07722	2.06735	3.39989	3.32602	4.63722	4.5901
Control_6	1.44647	1.3853	2.23581	2.1533	3.57981	3.47596	4.83847	4.72711
Control_7	1.36119	1.31638	2.10785	2.04171	3.36652	3.25771	4.53985	4.40971
Control_8	1.38367	1.39318	2.13034	2.13985	3.43167	3.46251	4.669	4.69985
Control_9	1.38799	1.34988	2.13466	2.09655	3.43599	3.35521	4.65199	4.50721
Control_10	1.3981	1.40342	2.14477	2.12875	3.3821	3.36608	4.5341	4.49675

## Sheet: Sprint mechanical variables
Group	F0_pre	F0_post	Vmax_pre	Vmax_post	Pmax_pre	Pmax_post	mean_RF_m10_pre	mean_RF_m10_post	peak_RF_pre	peak_RF_post	FV_slope_pre	FV_slope_post
HS60_1	7.30353	7.60919	9.30216	9.20078	16.8008	17.3222	0.292013	0.300612	0.494648	0.524025	-0.785143	-0.827015
HS60_2	7.16109	7.80999	9.89934	9.91131	17.5143	18.8462	0.296705	0.30996	0.474608	0.510565	-0.72339	-0.787987
HS60_3	7.66287	8.15106	8.82679	8.79478	16.731	17.7461	0.280651	0.29069	0.492491	0.522739	-0.868138	-0.926807
HS60_4	7.31949	7.84794	8.97225	8.85338	16.2521	16.7799	0.284242	0.280593	0.496409	0.50094	-0.815792	-0.886435
HS60_5	7.69034	7.99982	8.58636	8.91658	16.3491	17.5219	0.270923	0.289754	0.487088	0.515932	-0.895646	-0.897184
HS60_6	6.64001	7.93556	9.3497	9.2601	15.3461	17.7545	0.281425	0.292844	0.466914	0.514394	-0.710184	-0.856962
HS60_7	6.8481	7.67997	8.45126	9.08087	14.3273	16.6591	0.263077	0.277469	0.473004	0.492865	-0.810304	-0.84573
HS60_8	6.16056	6.76138	8.27436	8.526	12.6103	14.2009	0.23941	0.262149	0.419902	0.46539	-0.744536	-0.793031
HS60_9	8.30046	8.15771	8.71892	9.1859	17.9319	18.5478	0.281124	0.299786	0.507766	0.520702	-0.952006	-0.888068
HS50_1	6.90603	7.54544	9.23908	9.42326	15.7696	17.3201	0.276784	0.293866	0.459178	0.498947	-0.74748	-0.800724
HS50_2	7.64437	9.3954	9.39209	9.68241	17.7415	22.1879	0.3072	0.330629	0.527076	0.579448	-0.813916	-0.970357
HS50_3	7.02196	7.45558	9.53651	9.70536	16.5443	17.5632	0.291136	0.302469	0.477311	0.501925	-0.736324	-0.768192
HS50_4	7.0421	7.91732	9.05103	8.96979	15.7587	17.5794	0.276642	0.288947	0.469095	0.505893	-0.778044	-0.882664
HS50_5	7.37587	7.46525	8.34209	8.67617	15.2398	16.0339	0.258651	0.27435	0.470312	0.486971	-0.884175	-0.860431
HS50_6	8.50665	8.5675	8.8989	9.32781	18.7534	19.731	0.292237	0.307812	0.523298	0.534729	-0.955921	-0.918491
HS50_7	6.37372	7.7867	9.20136	9.42975	14.4762	18.1468	0.258138	0.301001	0.41264	0.50943	-0.692694	-0.825759
HS50_8	7.50747	7.49714	8.7373	9.4577	16.2329	17.2896	0.280282	0.295893	0.501608	0.502406	-0.859244	-0.792702
HS50_9	7.05744	7.64912	8.90379	9.10291	15.5484	17.0884	0.273138	0.282819	0.470522	0.48522	-0.792633	-0.840294
Control_1	7.14762	6.94212	8.59082	8.94866	15.1958	15.3399	0.268258	0.273426	0.478624	0.468777	-0.832008	-0.775772
Control_2	7.95896	7.4665	9.11516	9.56824	17.9445	17.66	0.301778	0.306603	0.529248	0.521649	-0.873156	-0.780342
Control_3	7.43943	7.65316	8.72368	9.16346	16.0699	17.356	0.280649	0.291662	0.500638	0.500997	-0.852786	-0.835182
Control_4	7.97417	8.22033	9.3023	8.72522	18.3469	17.7624	0.307525	0.291983	0.53372	0.535457	-0.857225	-0.942135
Control_5	8.12595	8.17392	8.52152	8.82973	17.1548	17.8648	0.28403	0.298318	0.525899	0.540751	-0.95358	-0.925727
Control_6	6.53247	7.43131	8.91319	8.53669	14.07	15.7034	0.267242	0.279582	0.465761	0.512046	-0.7329	-0.870514
Control_7	7.48169	7.99	9.23965	9.47865	17.0934	18.7112	0.298171	0.318379	0.515435	0.551268	-0.809737	-0.842947
Control_8	7.54261	7.52966	8.65592	8.66916	16.1667	15.9168	0.274349	0.282727	0.48971	0.510382	-0.871382	-0.868557
Control_9	7.24755	7.51852	8.91794	9.30062	15.9828	17.277	0.281311	0.304674	0.488075	0.527636	-0.812693	-0.808389
Control_10	6.91378	6.90514	9.65747	9.78052	16.4953	16.6898	0.293204	0.298551	0.480523	0.485726	-0.7159	-0.70601
																			0			0

## Sheet: Sprint kinematics
Group	Acceleration_Contacttime_pre	Acceleration_Contacttime_post	Acceleration_Stepfreq_pre	Acceleration_Stepfreq_post	Acceleration_Steplength_pre	Acceleration_Steplength_post	Acceleration_TrunkAngleTD_pre	Acceleration_TrunkAngleTD_post	Acceleration_TrunkAngleTO_pre	Acceleration_TrunkAngleTO_post	Acceleration_HipangleTD_pre	Acceleration_HipangleTD_post	Acceleration_HipangleTO_pre	Acceleration_HipangleTO_post	Acceleration_HipcontraAngleTD_pre	Acceleration_HipcontraAngleTD_post	Acceleration_HipcontraAngleTO_pre	Acceleration_HipcontraAngleTO_post	Acceleration_COMangleTD_pre	Acceleration_COMangleTD_post	Acceleration_COMangleTO_pre	Acceleration_COMangleTO_post	Acceleration_COMdistanceTD_pre	Acceleration_COMdistanceTD_post	Acceleration_COMdistanceTO_pre	Acceleration_COMdistanceTO_post	Maximalvelocity_Contacttime_pre	Maximalvelocity_Contacttime_post	Maximalvelocity_Stepfreq_pre	Maximalvelocity_Stepfreq_post	Maximalvelocity_Steplength_pre	Maximalvelocity_Steplength_post	Maximalvelocity_TrunkAngleTD_pre	Maximalvelocity_TrunkAngleTD_post	Maximalvelocity_TrunkAngleTO_pre	Maximalvelocity_TrunkAngleTO_post	Maximalvelocity_HipangleTD_pre	Maximalvelocity_HipangleTD_post	Maximalvelocity_HipangleTO_pre	Maximalvelocity_HipangleTO_post	Maximalvelocity_HipcontraAngleTD_pre	Maximalvelocity_HipcontraAngleTD_post	Maximalvelocity_HipcontraAngleTO_pre	Maximalvelocity_HipcontraAngleTO_post	Maximalvelocity_COMangleTD_pre	Maximalvelocity_COMangleTD_post	Maximalvelocity_COMangleTO_pre	Maximalvelocity_COMangleTO_post	Maximalvelocity_COMdistanceTD_pre
HS60_1	0.1895	0.1645	4.15191	4.51355	0.608385	0.569537	46.8012	45.6592	46.4023	43.9044	101.888	108.777	171.866	165.623	163.166	153.823	83.1276	83.3803	92.8138	90.086	45.3777	48.2044	-0.00351782	-0.013535	0.42519	0.410626	0.1185	0.1128	4.48755	4.74719	1.08868	1.07476	79.7219	79.9141	78.5416	77.7968	133.413	137.459	199.149	195.468	170.861	167.019	98.7995	99.6619	112.172	109.784	56.6285	56.6865	-0.214814
HS60_2	0.2065	0.1875	3.87266	4.28425	0.686342	0.640132	49.5863	45.1148	49.1205	45.8363	99.0045	94.5834	178.358	172.458	166.361	160.395	81.3046	81.6823	100.63	96.9521	46.4791	45.926	-0.0813383	-0.0529526	0.422329	0.431207	0.1205	0.125	4.43461	4.48637	1.01028	0.986041	77.2583	83.6571	75.3893	80.1553	135.888	139.955	202.772	207.041	176.896	174.547	103.797	101.988	111.798	113.429	55.4038	56.6995	-0.192033
HS60_3	0.1773	0.1667	4.60084	4.61538	0.576882	0.64727	34.7618	43.3467	35.8616	42.1395	99.7279	103.542	156.243	162.983	146.233	147.151	81.3296	77.8429	90.5164	91.7238	45.0938	47.5175	-0.0213172	-0.000653095	0.444013	0.436516	0.1175	0.1186	4.39741	4.49457	1.07951	1.07316	88.0041	83.7968	87.0641	86.3583	146.162	139.341	210.239	206.88	175.176	171.99	105.945	107.233	112.321	113.627	58.8323	59.4465	-0.215277
HS60_4	0.1991	0.1793	4.10277	4.23819	0.652444	0.616208	44.0041	43.515	45.2167	43.1493	91.9275	104.608	174.015	163.515	166.537	152.538	85.3496	86.8001	96.9101	93.5207	46.1611	47.2634	-0.0553229	-0.0274752	0.444725	0.43091	0.1252	0.1167	3.9096	4.48853	1.05963	1.04217	82.1698	82.774	81.413	82.305	137	142.136	195.88	201.192	166.876	173.501	105.348	111.518	112.192	109.856	58.4605	59.2867	-0.220186
HS60_5	0.2165	0.2271	4.04515	3.64451	0.710565	0.741161	57.1922	51.0309	55.0197	51.6975	105.784	99.8821	176.204	176.038	172.844	165.126	93.7565	86.4805	101.056	99.9415	48.2518	46.8219	-0.0665443	-0.0411801	0.492126	0.504849	0.1275	0.1187	4.58773	4.70784	1.09545	1.0259	76.7179	75.3893	76.8673	75.5849	125.835	126.565	199.459	194.649	179.638	164.314	106.461	102.556	116.673	114.022	55.8426	55.7078	-0.250159
HS60_6	0.1708	0.1712	4.23604	4.40029	0.576445	0.639321	51.2911	49.1661	48.3893	48.6242	103.016	101.806	180.458	181.984	169.354	164.568	83.7237	81.5563	94.0374	93.8378	46.681	46.4752	-0.0154683	0.0056778	0.398134	0.405193	0.1251	0.1425	3.9096	4.18094	0.992308	0.992308	75.8447	75.8447	73.1666	73.2016	133.672	133.672	197.975	197.975	177.578	177.578	110.058	110.058	112.858	112.935	56.8332	56.8332	-0.222511
HS60_7	0.1622	0.1605	4.22981	4.56964	0.570146	0.53922	43.9838	45.795	42.6396	44.1401	89.913	97.6933	165.293	165.808	157.606	152.56	75.443	75.98	98.848	95.2722	44.7541	45.6701	-0.00360348	-0.0193458	0.388403	0.386576	0.1315	0.1187	4.24003	4.36661	1.01246	1.043	82.6424	85.6242	82.5219	84.6476	136.216	141.653	202.184	204.784	175.14	169.361	104.649	106.797	112.224	108.767	59.4332	59.501	-0.223772
HS60_8	0.1955	0.1753	4.14592	4.33713	0.516737	0.545921	48.9733	45.8985	48.2785	44.3564	110.996	111.465	166.513	165.162	156.336	143.299	96.7061	84.6935	92.1115	89.2504	49.9848	49.4473	-0.0944573	-0.0834929	0.370864	0.379363	0.1565	0.1411	4.24676	4.24676	0.987579	0.994659	80.3988	81.0619	78.3491	77.2005	126.707	133.429	196.676	196.564	175.472	177.747	101.378	98.8037	117.46	114.464	52.5731	54.3268	-0.268091
HS60_9	0.1855	0.1773	4.30269	4.29015	0.620693	0.649592	44.6582	43.9429	45.6405	43.785	110.445	105.24	167.374	163.46	151.224	150.994	90.2402	87.1782	90.462	92.3378	48.6442	49.3807	-0.031655	-0.031264	0.428937	0.424843	0.1271	0.123	4.48467	4.61538	1.07321	1.03015	76.6098	75.3404	74.7311	76.8162	129.866	130.187	204.1	206.128	183.015	177.879	108.49	111.369	113.913	112.076	55.445	55.7056	-0.23502
HS50_1	0.1725	0.1893	4.49495	4.20453	0.645429	0.635914	56.1453	56.0641	49.9891	53.1409	119.459	106.881	173.999	174.331	161.035	168.368	82.8506	79.8913	90.295	94.5179	46.3225	46.3831	-0.00206492	-0.0342511	0.413728	0.411972	0.1232	0.1211	4.53082	4.52369	1.09237	1.10068	69.5145	71.8848	67.6742	71.6568	126.076	123.215	191.958	194.56	168.485	171.44	94.283	96.8938	113.486	114.887	52.7167	50.9056	-0.217884
HS50_2	0.1959	0.1548	4.07773	5.08337	0.650751	0.666253	46.7531	43.2215	45.2795	43.1905	96.1643	99.2144	176.558	171.79	172.119	156.963	82.7697	77.2531	98.3742	93.7649	45.1543	46.5961	-0.064267	-0.0293805	0.445066	0.439646	0.1294	0.1124	4.44585	4.66264	1.11452	1.14538	79.2599	75.9936	79.6525	76.479	133.491	128.958	208.828	202.683	191.341	176.318	120.974	107.671	114.13	112.152	57.2935	56.5119	-0.243391
HS50_3	N/A	N/A	N/A	N/A	N/A	N/A	N/A	N/A	N/A	N/A	N/A	N/A	N/A	N/A	N/A	N/A	N/A	N/A	N/A	N/A	N/A	N/A	N/A	N/A	N/A	N/A	N/A	N/A	N/A	N/A	N/A	N/A	N/A	N/A	N/A	N/A	N/A	N/A	N/A	N/A	N/A	N/A	N/A	N/A	N/A	N/A	N/A	N/A	N/A
HS50_4	0.1815	0.179	3.95931	4.18112	0.638588	0.659588	52.6846	51.7919	52.7356	50.4411	108.032	104.052	178.209	174.99	165.659	164.752	87.1895	85.365	94.8781	98.7371	47.6299	46.5466	-0.0375005	-0.0680592	0.417609	0.431522	0.1211	0.1091	4.57575	4.60986	1.11865	1.05254	78.3623	82.0615	79.5433	80.7874	132.861	140.764	203.119	203.355	169.131	170.373	101.668	105.24	112.164	110.247	55.7372	59.7335	-0.212349
HS50_5	0.1753	0.1642	4.29073	4.62428	0.613736	0.615365	44.3466	50.3267	46.9966	48.6092	109.705	117.471	172.247	174.197	152.427	159.958	94.2701	94.9206	90.2138	88.6876	48.0569	48.9267	-0.00140542	0.0121442	0.441329	0.437984	0.1153	0.1212	4.24003	4.70769	1.08801	1.00867	78.5889	77.8643	78.2369	77.8044	143.795	139.694	202.711	206.018	178.814	176.837	110.528	110.07	110.855	111.659	62.1417	56.9447	-0.204769
HS50_6	0.1933	0.1985	4.25929	4.3956	0.642215	0.595041	46.6303	48.7728	45.8663	51.6057	95.5318	99.2934	170.275	176.979	166.232	164.887	85.8727	91.0825	97.7182	96.907	44.997	45.4263	-0.059904	-0.0540665	0.446003	0.437906	0.1234	0.123	4.51654	4.77273	1.01905	0.991304	84.3483	81.9079	85.2964	77.8787	137.546	135.576	200.727	195.935	171.93	170.74	109.158	104.847	113.577	113.052	58.7349	57.9975	-0.227213
HS50_7	0.1982	0.1668	4.06093	4.45238	0.656103	0.646279	48.1708	48.7211	48.8865	50.6514	98.0861	105.289	169.657	173.721	159.353	153.048	88.5517	86.0993	97.6658	91.8507	47.8067	47.8368	-0.061851	-0.0150544	0.420473	0.421867	0.1167	0.1187	4.60829	4.85018	1.11356	1.13204	79.9742	77.3054	79.0928	77.8761	171.332	168.47	203.533	204.287	175.708	174.444	107.736	106.415	112.42	112.411	56.6601	54.5884	-0.216576
HS50_8	0.1855	0.2541	4.24532	3.62562	0.681582	0.666222	46.55	43.2239	44.0387	42.9045	103.24	99.8784	174.999	168.745	166.067	163.008	82.7077	87.531	97.4057	86.5575	45.7225	46.1805	-0.0589733	0.026879	0.437707	0.430583	0.1105	0.1083	4.50469	4.57516	1.1491	1.13926	82.4532	83.6138	85.1016	83.2343	149.256	149.291	208.84	205.084	167.721	161.553	111.684	104.893	110.192	108.703	59.5623	56.8395	-0.213634
HS50_9	0.2105	0.1835	4.09864	4.33667	0.553852	0.597194	51.6094	48.6065	49.3585	47.95	106.427	108.38	174.498	176.892	171.959	161.546	89.684	82.8978	95.1681	89.6512	47.1778	46.6209	-0.0390332	0.0037253	0.412147	0.426736	0.1295	0.127	4.3958	4.52814	0.969031	0.974935	76.3853	77.133	76.8824	75.0826	132.05	135.363	199.952	201.749	171.263	172.305	99.917	99.5835	109.784	109.539	57.7374	55.1988	-0.190619
Control_1	0.1973	0.2214	4.11179	3.6423	0.569321	0.612432	54.9687	54.3402	54.6955	54.7623	105.829	109.414	171.616	170.991	167.076	161.987	99.8903	97.5105	96.1743	95.3855	49.6153	48.5898	-0.0521921	-0.0440712	0.409572	0.423337	0.1241	0.1215	4.28834	4.42397	1.01916	0.985481	79.163	80.0459	79.5627	79.1799	135.36	133.648	196.67	196.595	170.388	166.792	104.088	106.773	114.674	113.28	57.6266	58.6887	-0.227704
Control_2	0.1635	0.1605	4.63468	4.56964	0.556632	0.639324	51.9568	50.3056	51.502	50.071	110.957	106.386	175.26	172.729	160.64	157.663	90.2775	85.68	88.0111	91.1335	44.5939	46.2418	0.0149248	-0.00936245	0.444983	0.442623	0.1122	0.1093	4.49533	4.5361	1.16715	1.10404	83.288	84.0848	80.2341	84.9158	132.621	140.881	211.484	211.66	176.138	170.29	110.378	107.962	113.866	113.735	52.9848	55.1307	-0.227293
Control_3	0.2132	0.1795	3.96726	4.17391	0.71074	0.745473	35.7479	39.715	37.0057	40.9746	86.7944	94.9976	163.7	166.046	155.678	151.115	76.4879	78.8585	103.251	97.7519	45.7432	46.6843	-0.065221	-0.0588653	0.445902	0.450591	0.1234	0.1231	4.51654	4.77273	1.1095	1.07929	84.3483	81.9079	85.2964	77.8787	137.546	135.576	200.727	195.935	171.93	170.74	109.158	104.847	113.577	113.052	58.7349	57.9975	-0.24738
Control_4	0.1652	0.1942	4.20643	3.80728	0.662139	0.712193	45.1796	40.8449	44.7111	42.7397	101.956	95.9932	174.348	172.221	154.289	148.84	76.912	76.4796	90.1942	95.3106	48.9499	48.1668	-0.00215435	-0.0434041	0.426034	0.424861	0.1182	0.1252	4.23086	3.99831	1.05873	1.04533	77.4839	77.9105	82.9528	82.1041	127.359	132.06	206.521	206.889	175.316	174.181	106.271	113.842	114.172	113.812	56.3255	59.5157	-0.215078
Control_5	0.1883	0.1825	4.24651	4.05156	0.641355	0.688953	51.3899	45.9025	49.1175	48.2403	111.228	105.833	179.049	176.512	168.612	159.389	91.0883	88.2081	93.4572	94.0107	48.5354	47.882	-0.0293194	-0.034236	0.448636	0.446705	0.1164	0.1141	4.48611	4.50265	1.04467	1.04708	78.4539	78.3736	80.1564	79.4447	145.81	142.051	210.283	207.067	174.59	176.074	102.571	108.709	111.63	111.542	58.6108	60.8638	-0.201397
Control_6	0.1775	0.1795	4.39817	4.50205	0.567608	0.590541	50.3218	47.6004	48.9128	47.4093	113.671	111.235	165.424	167.574	154.44	156.321	91.6437	94.2778	88.1208	88.6676	49.5796	48.711	0.0138923	0.00941033	0.401429	0.422178	0.1067	0.1192	4.29102	4.58768	1.00562	0.884807	76.8528	77.4577	79.8926	80.9271	142.287	144.529	193.465	193.271	145.481	133.655	98.0881	94.2431	107.516	105.369	58.6114	58.5567	-0.176425
Control_7	0.1653	0.1591	4.58773	4.93902	0.631353	0.652735	47.4223	45.2659	45.1042	45.9885	99.7538	101.123	171.714	171.59	169.433	158.979	88.4141	85.8901	94.4192	90.6982	45.5735	46.4987	-0.0356806	-0.00549201	0.440619	0.445402	0.1125	0.1111	4.75084	5.00337	1.02385	0.968613	69.3498	71.5703	66.1486	71.9377	129.755	128.444	198.402	198.164	188.732	180.37	110.37	112.019	111.796	112.959	53.2283	54.9664	-0.209554
Control_8	0.1883	0.1855	3.9705	3.843	0.696939	0.642313	46.9469	45.589	46.675	46.8232	104.354	108.227	168.037	170.223	159.174	148.6	87.3262	89.1607	95.7517	94.9052	48.9047	49.6369	-0.049372	-0.0422269	0.424771	0.41175	0.1245	0.1212	4.77148	4.21239	0.864211	0.966388	73.9615	82.8994	73.7396	82.8603	134.955	139.529	200.543	200.591	167.606	170.873	109.108	110.349	108.541	111.92	54.9341	58.459	-0.193989
Control_9	0.1725	0.1563	4.52637	4.44457	0.584831	0.668672	42.0115	44.0445	39.397	40.7843	99.8116	104.913	162.795	166.797	153.987	150.823	78.8248	77.0973	89.1025	89.1839	46.9489	47.0599	0.00765885	0.00673228	0.433802	0.439863	0.1162	0.1123	4.61221	4.70695	0.985805	1.0122	75.1338	75.2664	73.2238	75.4812	131.938	128.306	200.635	202.517	180.324	179.252	106.803	108.581	112.767	112.26	58.6685	58.7024	-0.192335
Control_10	0.1941	0.1835	4.06498	4.23611	0.606951	0.592241	46.8445	46.3227	47.5377	48.1709	90.8044	96.3308	168.813	172.383	148.253	147.048	70.7556	73.2285	98.7633	95.9905	45.109	45.9029	-0.0698542	-0.0476485	0.45112	0.445103	0.1193	0.1223	4.56659	4.5469	1.03437	1.05059	81.1432	80.6383	79.1902	79.3123	133.399	131.086	199.11	199.592	161.64	166.685	98.8641	100.257	112.521	113.473	54.141	54.2633	-0.216165
[truncated: 3 more columns]

## Sheet: Immediate influence of sled
Group	Contacttime__sled	Stepfreq__sled	Steplength__sled	TrunkAngleTD__sled	TrunkAngleTO__sled	HipangleTD__sled	HipangleTO__sled	HipcontraAngleTD__sled	HipcontraAngleTO__sled	COMangleTD__sled	COMangleTO__sled	COMdistanceTD__Sled	COMdistanceTO__Sled
HS60_1	0.2633	3.53015	0.508502	31.14	31.0516	85.7251	161.854	159.703	80.9285	87.7857	40.9213	0.0159985	0.475158
HS60_2	0.2581	3.6372	0.447606	42.5941	41.7416	103.57	171.686	169.222	92.6281	80.4384	44.3	0.0720857	0.45137
HS60_3	0.1965	4.35897	0.393908	38.0979	37.519	111.804	159.013	145.571	88.4512	77.346	46.3516	0.0949996	0.395683
HS60_4	0.2501	3.41125	0.676039	56.1386	57.4451	152.55	187.97	136.243	97.7474	64.4775	46.5627	0.245746	0.443103
HS60_5	0.2713	3.49716	0.482143	35.4346	35.6405	91.7033	168.08	164.33	80.4775	82.1012	41.0978	0.0599698	0.475912
HS60_6	N/A	N/A	N/A	N/A	N/A	N/A	N/A	N/A	N/A	N/A	N/A	N/A	N/A
HS60_7	0.2333	3.79913	0.36257	37.4226	41.7247	111.98	168.461	152.295	100.776	72.1591	45.0287	0.147079	0.45531
HS60_8	0.3694	2.60792	0.534617	48.7801	48.5465	99.0099	180.996	173.854	89.7917	91.6194	45.3709	-0.0135924	0.490892
HS60_9	0.3015	3.11052	0.430805	46.1802	47.7019	104.018	184.396	171.475	91.3728	82.671	42.8002	0.0546627	0.464388
HS50_1	0.2166	3.62562	0.513016	51.8566	50.2342	111.124	174.161	158.526	81.1522	87.7324	47.0343	0.0168484	0.404699
HS50_2	0.2414	3.47715	0.509312	46.4021	47.4622	102.667	182.588	165.571	73.6727	83.9819	45.2382	0.0461869	0.458241
HS50_3	N/A	N/A	N/A	N/A	N/A	N/A	N/A	N/A	N/A	N/A	N/A	N/A	N/A
HS50_4	0.202	4.07834	0.572873	46.0637	44.9602	108.561	174.975	159.416	82.9883	86.1649	44.4064	0.0304228	0.465433
HS50_5	0.2695	3.19559	0.606713	45.6796	48.91	107.922	185.836	169.215	85.2678	84.0656	43.0482	0.0491634	0.501592
HS50_6	0.3025	2.93885	0.605163	49.9162	49.9153	104.77	185.99	185.636	89.1029	89.1799	42.6859	0.00670374	0.477285
HS50_7	0.1975	4.01618	0.600248	48.2903	50.4946	108.687	180.719	162.257	89.264	89.2982	44.8539	0.00440136	0.463293
HS50_8
HS50_9
